# Supplementary material
Source: Springer Nature journal article supplement (https://www.springermedizin.de/resource/supplementary/12885_2009_1786_MOESM10_ESM.pdf/9472928)
Supplement: MOESM10 [file 9472928]

## UP

## DOWN

|                    |           |           |           |            |              |           |
|--------------------|-----------|-----------|-----------|------------|--------------|-----------|
| KCNH8              | EGR4      | ARL14     | KIAA1913  | COL25A1    | CTSB         | GDEP      |
| HS6ST2             | CRISP3    | TEX14     | C18orf19  | LOC144871  | RNASE4       | BF939996- |
| KCNG3              | AGR2      | TNFSF15   | C6orf128  | EGFR       | IFITM1       | GBP1      |
| ATF3               | AMACR     | OR51E2    | R55749-   | ADD3       | NAT1         | AW262311- |
| cDNA IMAGE:5260162 | AMACR     | NALP2     | ACRC      | GBP1       | LSAMP        | AI478743- |
| CHRM3              | AMACR     | BF739971- | BF26530-  | GBP1       | RLN2         | CPM       |
| ERG                | DUSP5     | NSUN6     | AV693202- | GBP2       | AL137508-    | HLA-DRB1  |
| BRE                | KHDRBS3   | OBFC2A    | GRM7      | ANPEP/CD13 | ARHGEF10     | EFHA2     |
| CEACAM5            | INDO      | PCDHB10   | XDH       | IFIT1      | A2M          | AV707318- |
| LTF/LOC643349      | BE550599- | C19orf30  | DLX1      | MME/CD10   | AGPAT5       | LOC647322 |
| HLA-DMB            | INHBA     | GDA       | R55784-   | MME/CD10   | LEPREL1      | RPIB9     |
| LOX                | PTPRR     | FZD8      | KIAA0960  | ABP1       | ATP8B4       | HSPD1     |
| NEO1               | KMO       | TMEM45B   | SQSTM1    | FLI1       | LOC286044    | AI245074- |
| MMP1               | ALDH1A1   | FLJ25076  |           | EFS        | SDPR         | NEFH      |
| TOX                | KIAA1199  | DTNA      |           | NEFH       | LMAN1L/CPLX3 |           |
| MMP12              | SQSTM1    | AI343467- |           | WIF1       | CDK6         |           |
| CGA                | KIAA0802  | FAM101A   |           | ENPEP      | C8orf42      |           |
| F5                 | HSPA6     | C9orf150  |           | ANG/RNASE4 | ERICH1       |           |
| RRAD               | COL2A1    | CCDC21    |           | RNASE4     | AFF3         |           |
| FGL2               | ERG       | BCMP11    |           | CMAH       | VGLL3        |           |
| HPN                | KIAA0960  | ELAVL2    |           | SV2B       | TNFRSF19     |           |
| KMO                | TNFRSF21  | AGR2      |           | PRIM2A     | AI635774-    |           |
| AGTR1              | T15991-   | KIAA0960  |           | AKAP7      | AI797678-    |           |
| DCAMKL1            | KIAA0960  | MGC33926  |           | AI269290-  | AI858493-    |           |
| C5                 | TRIM58    | FLJ42562  |           | ADD3       | BE673665-    |           |
| MMP10              | LOX       | DCAMKL1   |           | DPYS       | BIRC4BP      |           |
| TYRP1              | TNRC9     | SDK1      |           | MSMB/PSP94 | CYYR1        |           |
| PTPRR              | SLC7A11   | KIAA0960  |           | METTL7A    | SOX7         |           |
| BMP6               | TNFRSF21  | HS6ST2    |           | FDFT1      | AW236803-    |           |
| IL24               | EFTUD1    | AI741597- |           | CRYAB      | LOC647248    |           |
| ZNF165             | TRPM4     | TMEM45B   |           | HLA-DQB1   | SLC14A1      |           |
| CDKN2A             | GCNT3     | GMDS      |           | LEPR       | AI075407-    |           |
| DLX2               | DDX43     | AW299568- |           | RGS20      | NPAL3        |           |
| ICAM4              | ZNFN1A5   | RUNX2     |           | MSMB/PSP94 | PI15         |           |
| SLC22A1            | RGS17     | OR51E2    |           | FDFT1      | AW014022-    |           |
| P2RY1              | DNASE2B   | OBFC2A    |           | RLN1       | C8orf42      |           |
